# Supplementary material
Source: PubMed Central journal article supplement (PMC2999827)
Supplement: NIHMS33625-supplement-Suppl_Mat.pdf [file NIHMS33625-supplement-Suppl_Mat.pdf]

## Supplementary Material

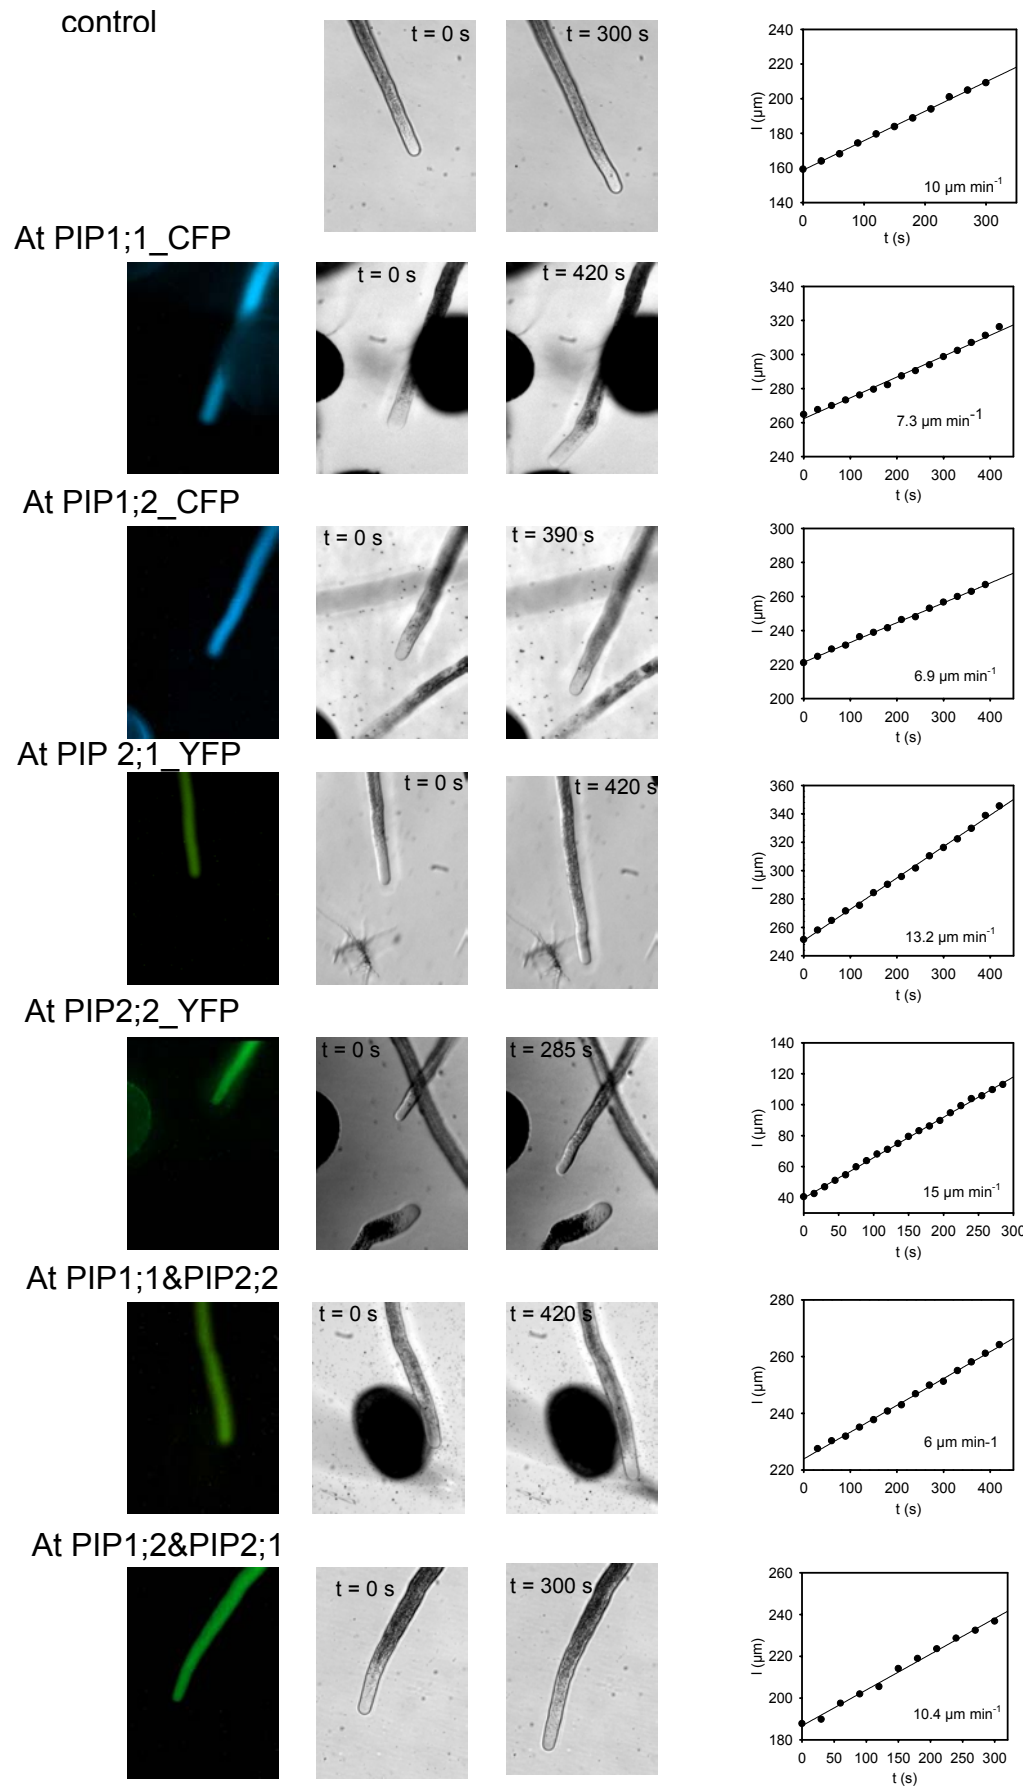

### **Supplements Fig. 1**

Typical pollen tubes of control and transformed lily pollen grains are growing in Med B. Images were obtained from video sequences used to determine the growth rate of individual pollen tubes. A fluorescent (left) image was taken to confirm the transformation due to the expression of the respective fluorescent protein. A bright field (middle) at the start of the video sequence and an image (right) at the end of the measurement were taken. The length (l) of the pollen grains was plotted against the time (s) to determine the respective growth rates. Transformed pollen tubes show no morphological differences as compared to control pollen tubes, e.g. growth rates, tube diameters, clear cap appearance or cytoplasmic streaming.
